# Supplementary material
Source: HighWire-hosted journal article supplement (http://d2538ggaoe6cji.cloudfront.net/highwire/filestream/55940/field_highwire_adjunct_files/0/127936-1.pdf)
Supplement: 127936-1.pdf [file 127936-1.pdf]

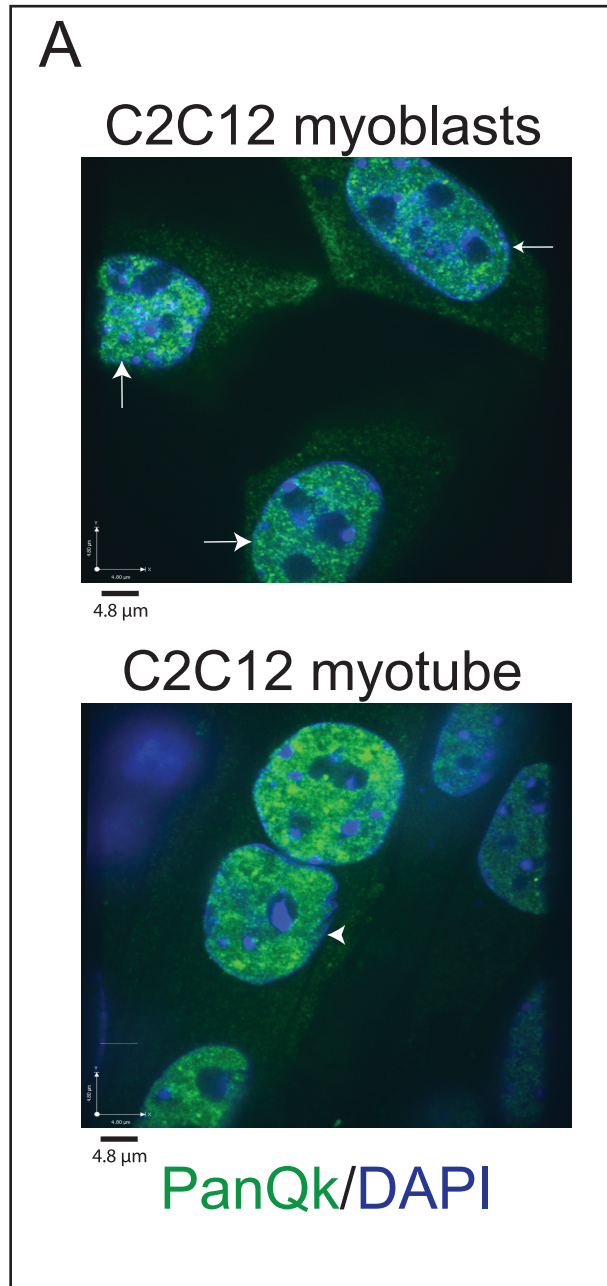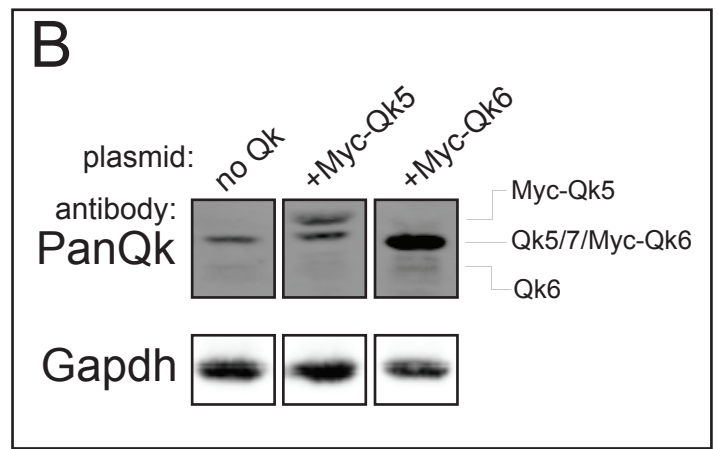

Figure S1 (supplemental to Figure 1): A. Indirect immunofluorescence showing PanQk antibody staining in green and DAPI staining in blue in undifferentiated C2C12 myoblasts (left, arrows show nuclei from individual cells) or differentiated C2C12 myotube (right, arrowheads show three nuclei in single myotube); scale bar represents 4.8  $\mu\text{m}$ . B. Representative western blot of whole cell extracts prepared from C2C12 myoblasts transfected as described in Fig 1E and 1F probed simultaneously with PanQk antibody (top; notation to the right indicates observed protein migration pattern) and Gapdh (bottom).
